# Supplementary material for: Dual drive mode polydopamine nanomotors for continuous treatment of an inferior vena cava thrombus
Source: Royal Society of Chemistry journal article supplement (doi:10.1039/d1tb01202a), 2021-01-01
Supplement: d1tb01202a1.pdf [file d1tb01202a1.pdf]

## Supplementary Information

# Dual drive mode polydopamine nanomotors for continuous treatment of inferior vena cava thrombus

Dan Fang,<sup>‡a</sup> Ting Li,<sup>‡a</sup> Ziyu Wu,<sup>b</sup> Qi Wang,<sup>a</sup> Mimi Wan,<sup>\*a</sup> Min Zhou<sup>b</sup> and Chun Mao<sup>\*a</sup>

<sup>a</sup> National and Local Joint Engineering Research Center of Biomedical Functional Materials, School of Chemistry and Materials Science, Nanjing Normal University, 210023, China.

<sup>b</sup> Department of Vascular Surgery, Nanjing Drum Tower Hospital, The Affiliated Hospital of Nanjing University Medical School, Nanjing 210008, China.

<sup>‡</sup> These authors contributed equally to this work.

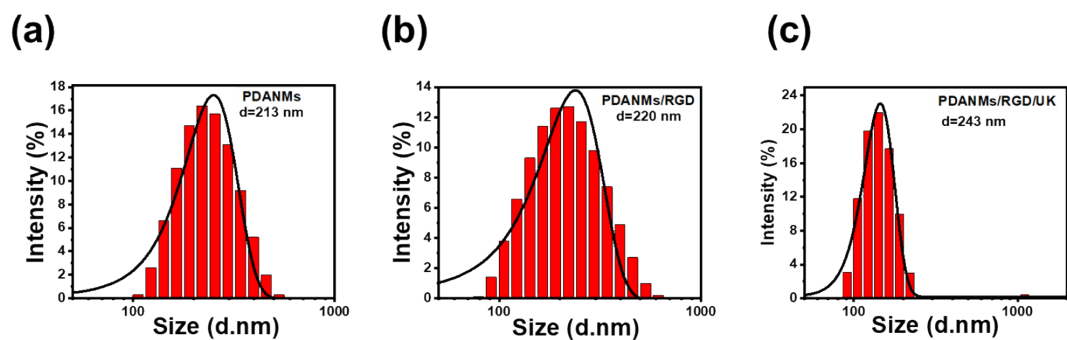

**Fig. S1** Dynamic light scattering (DLS) of (a) PDANMs, (b) PDANMs/RGD and (c) PDANMs/RGD/UK.

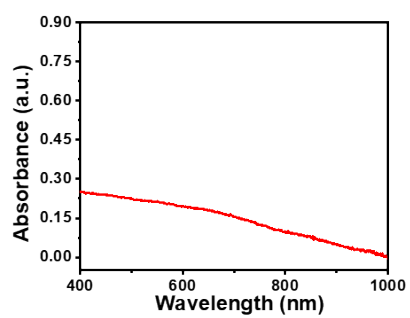

**Fig. S2** The UV-vis-NIR spectrum of PDANMs/RGD/UK ( $0.3 \text{ mg}\cdot\text{mL}^{-1}$ ).

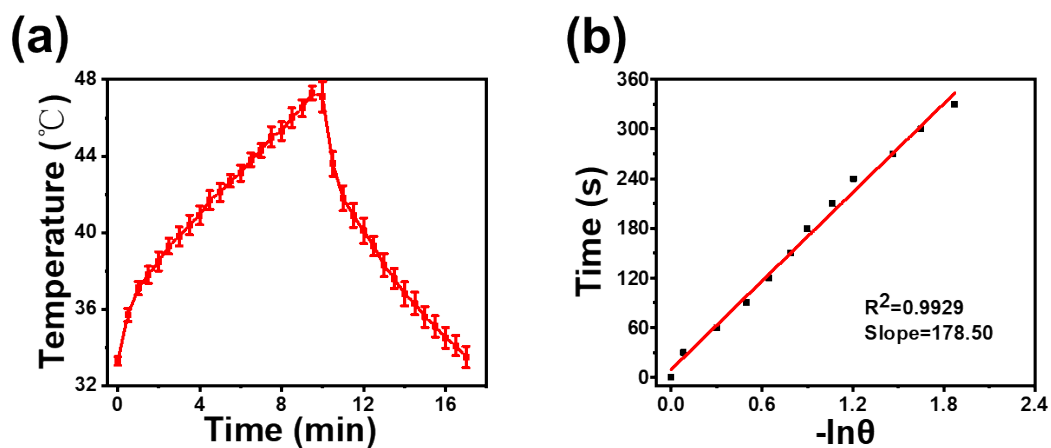

**Fig. S3** (a) The relationship between temperature and time of PDANMs/RGD/UK ( $0.3 \text{ mg}\cdot\text{mL}^{-1}$ ) aqueous solution after irradiating by NIR for 10 min and cooling to room temperature ( $808 \text{ nm}$ ,  $2 \text{ W}\cdot\text{cm}^{-2}$ ). (b) The relationship between cooling time and negative natural logarithm function of temperature during the cooling stage when the concentration of PDANMs/RGD/UK is  $0.3 \text{ mg}\cdot\text{mL}^{-1}$ .

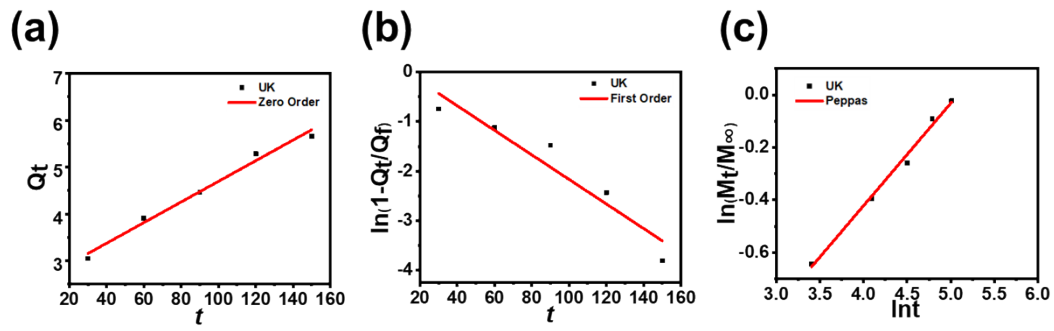

**Fig. S4** Three classical models to study release mechanism of UK. (a)Zero-order release model, (b)First-order release model and (c) Peppas release model.

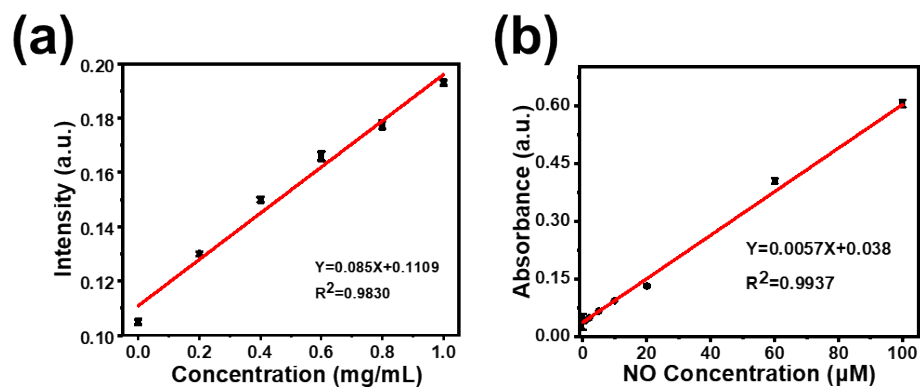

**Fig. S5** The standard curves for (a) RGD detection and (b) NO detection.

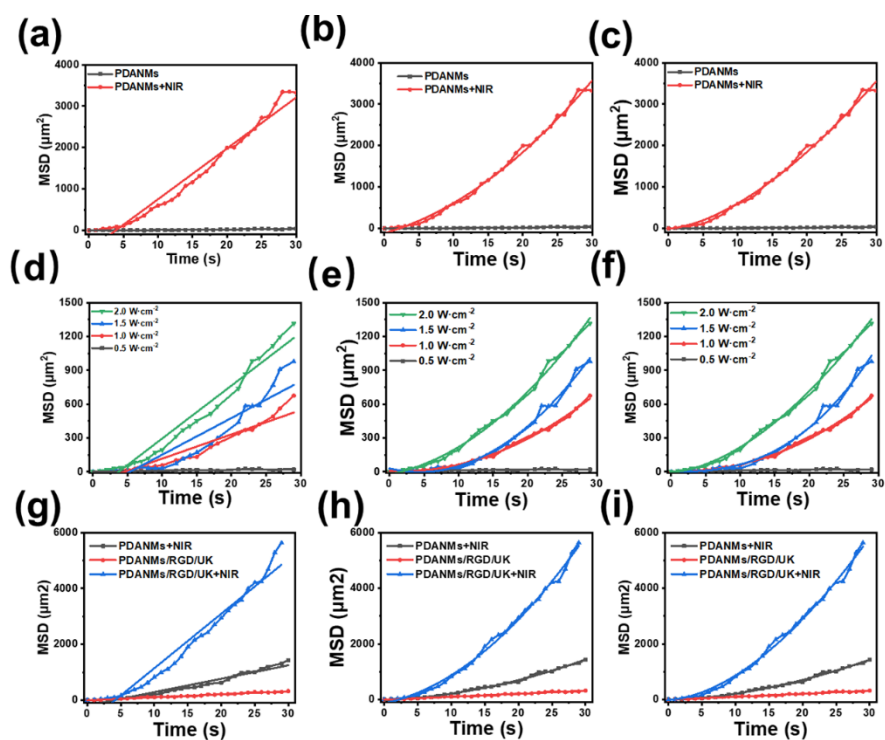

**Fig. S6** The motion behavior study of nanomotors. (a) Linear, (b) parabolic and (c) power function fitting results for MSD plot when PDANMs moved in PBS; (d) Linear, (e) parabolic and (f) power function fitting results for MSD plot when PDANMs irradiated by different NIR power densities in HUVECs stimulated by LPS; (g) Linear, (h) parabolic and (i) power function fitting results for MSD plot when nanomotors driving by different modes in HUVECs stimulated by LPS.

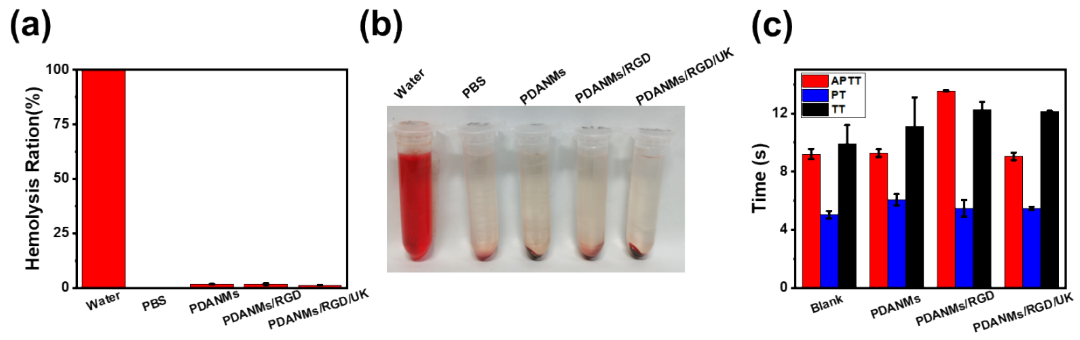

**Fig. S7** (a) The hemolysis rates of blood after incubating with different samples at 37°C and (b) their corresponding photograph of hemolysis; (c) Coagulation time of platelet poor plasma after incubating with different samples at 37°C.



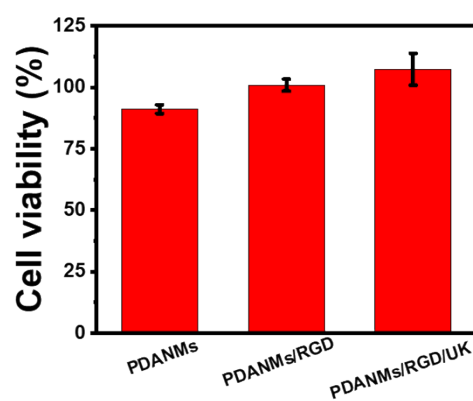

**Fig. S8** The cell viability of HUVECs incubated with  $0.3 \text{ mg}\cdot\text{mL}^{-1}$  PDANMs, PDANMs/RGD and PDANMs/RGD/UK.

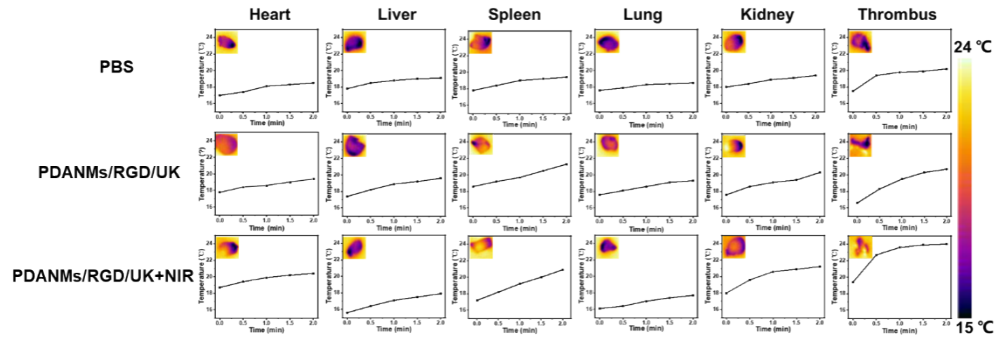

**Fig. S9** The temperature curves of the main organs and thrombus irradiating by 808 nm NIR light ( $2 \text{ W} \cdot \text{cm}^{-2}$ , 2 min).

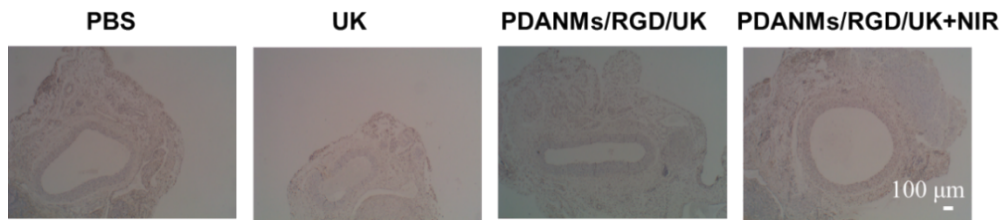

**Fig. S10** TUNEL staining sections of blood vessel in different groups.

**Table. S1** Parameters and coefficients obtained for Zero-order release model  $Q_t = K_0t$ , First-order release model  $\ln(1-Q_t/Q_f) = -K_1t$  and Peppas release model  $\ln(M_t/M_\infty) = \ln a + b \ln t$  fitted to the UK release profiles from PDANMs/RGD/UK.

| Release models | Release parameters | UK     |
|----------------|--------------------|--------|
| Zero order     | $K_0$              | 0.022  |
|                | $R^2$              | 0.9864 |
| First Order    | $K_1$              | 0.025  |
|                | $R^2$              | 0.9157 |
| Peppas         | a                  | 0.13   |
|                | b                  | 0.39   |
|                | $R^2$              | 0.9902 |

**Table. S2** Linear function fitting parameters for MSD plot of PDANMs with/without NIR irradiation in PBS ( $y = a + bx$ ).

| NIR     | $R^2$  | a       | b      |
|---------|--------|---------|--------|
| Without | 0.8147 | -3.31   | 1.29   |
| With    | 0.9693 | -478.16 | 122.93 |

**Table S3** Parabolic function fitting parameters for MSD plot of PDANMs with/without NIR irradiation in PBS ( $y = ax^2 + bx + c$ ).

| NIR     | $R^2$  | a     | b     | c       |
|---------|--------|-------|-------|---------|
| Without | 0.8616 | 0.036 | 0.21  | 1.90    |
| with    | 0.9948 | 2.50  | 47.99 | -115.93 |

**Table. S4** Power function fitting parameters for MSD plot of PDANMs with/without NIR irradiation in PBS ( $y = ax^b$ ).

| NIR     | $R^2$  | a     | b    |
|---------|--------|-------|------|
| Without | 0.8496 | 0.21  | 1.55 |
| with    | 0.9954 | 14.84 | 1.61 |

**Table. S5** Linear function fitting parameters for MSD plot of PDANMs with NIR irradiation under different power densities in HUVECs stimulated by LPS ( $y = a + bx$ ).

|     | Power density ( $W \cdot cm^{-2}$ ) | $R^2$  | a       | b     |
|-----|-------------------------------------|--------|---------|-------|
| NIR | 0.5                                 | 0.6267 | 3.04    | 0.73  |
|     | 1                                   | 0.9107 | -98.16  | 21.52 |
|     | 1.5                                 | 0.8620 | -173.60 | 32.55 |
|     | 2                                   | 0.9579 | -173.94 | 46.94 |

**Table. S6** Parabolic function fitting parameters for MSD plot of PDANMs with NIR irradiation under different power densities in HUVECs stimulated by LPS ( $y = ax^2 + bx + c$ ).

|     | Power density ( $W \cdot cm^{-2}$ ) | $R^2$  | a      | b      | c      |
|-----|-------------------------------------|--------|--------|--------|--------|
| NIR | 0.5                                 | 0.7322 | -0.040 | 1.85   | -1.80  |
|     | 1                                   | 0.9960 | 0.87   | -3.06  | 7.96   |
|     | 1.5                                 | 0.9923 | 1.67   | -14.74 | 30.56  |
|     | 2                                   | 0.9958 | 1.23   | 12.06  | -23.35 |

**Table. S7** Power function fitting parameters for MSD plot of PDANMs with NIR irradiation under different power densities in HUVECs stimulated by LPS ( $y = ax^b$ ).

|     | Power density ( $W \cdot cm^{-2}$ ) | $R^2$  | a    | b    |
|-----|-------------------------------------|--------|------|------|
| NIR | 0.5                                 | 0.6383 | 2.75 | 0.63 |
|     | 1                                   | 0.9960 | 0.44 | 2.17 |
|     | 1.5                                 | 0.9917 | 0.16 | 2.60 |
|     | 2                                   | 0.9963 | 4.22 | 1.71 |

**Table. S8** Linear function fitting parameters for MSD plot of nanomotors with different drive modes in HUVECs stimulated by LPS ( $y = a + bx$ ).

| Nanomotors        | Drive Mode | $R^2$  | a       | b      |
|-------------------|------------|--------|---------|--------|
| PDANMS            | NIR        | 0.9536 | -195.41 | 48.08  |
| PDANMs/RGD/UK     | NO         | 0.9819 | -5.89   | 10.73  |
| PDANMs/RGD/UK+NIR | NIR+NO     | 0.9591 | -805.93 | 195.07 |

**Table. S9** Parabolic function fitting parameters for MSD plot of nanomotors with different drive modes in HUVECs stimulated by LPS ( $y = ax^2 + bx + c$ ).

| Nanomotors        | Drive Mode | R <sup>2</sup> | a      | b     | c       |
|-------------------|------------|----------------|--------|-------|---------|
| PDANMS            | NIR        | 0.9954         | 1.26   | 10.77 | -18.79  |
| PDANMs/RGD/UK     | NO         | 0.9819         | 0.0034 | 10.63 | -5.40   |
| PDANMs/RGD/UK+NIR | NIR+NO     | 0.9960         | 4.95   | 51.38 | -135.40 |

**Table. S10** Power function fitting parameters for MSD plot of nanomotors with different drive modes in HUVECs stimulated by LPS ( $y = ax^b$ ).

| Nanomotors        | Drive Mode | R <sup>2</sup> | a     | b    |
|-------------------|------------|----------------|-------|------|
| PDANMS            | NIR        | 0.9955         | 3.84  | 1.74 |
| PDANMs/RGD/UK     | NO         | 0.9800         | 9.11  | 1.04 |
| PDANMs/RGD/UK+NIR | NIR+NO     | 0.9962         | 15.95 | 1.74 |

**Table. S11** Blood routine analysis of rats after being treated with different samples for 7 d.

| Group                                                  | PBS  | UK   | PDANMs/RGD/<br>UK | PDANMs/RGD/<br>UK+NIR |
|--------------------------------------------------------|------|------|-------------------|-----------------------|
| Percentage of monocytes (%)                            | 1.8  | 3.2  | 1.8               | 2.5                   |
| Neutrophil count (10 <sup>9</sup> /L)                  | 0.7  | 1.3  | 0.9               | 0.9                   |
| Red blood cell count (10 <sup>12</sup> /L)             | 6.68 | 6.42 | 6.8               | 6.72                  |
| Hemoglobin (HGB) (g/L)                                 | 129  | 124  | 141               | 137                   |
| Hematocrit (HCT) (%)                                   | 40   | 38.7 | 42.9              | 41.8                  |
| Mean corpuscular volume (MCV) (fl)                     | 59.9 | 60.3 | 63.1              | 62.2                  |
| Mean hemoglobin content (MHC) (pg)                     | 19.3 | 19.3 | 20.7              | 20.4                  |
| Mean corpuscular hemoglobin concentration (MCHC) (g/L) | 323  | 320  | 329               | 328                   |
| RBC volume distributing width (RDW) (%)                | 12.4 | 12.2 | 12.3              | 12.2                  |

**Table. S12** Values of serum enzymes in blood of rats after being treated with different samples for 7 d.

| Group                                  | PBS   | UK   | PDANMs/RGD/<br>UK | PDANMs/RGD/UK<br>+NIR |
|----------------------------------------|-------|------|-------------------|-----------------------|
| Alanine transaminase<br>(ALT)          | 26.8  | 46.9 | 24.8              | 25.2                  |
| Aspartate<br>aminotransferase<br>(AST) | 124.4 | 319  | 132               | 148.9                 |
| Total protein (TP)                     | 57.9  | 51.4 | 60.5              | 52.8                  |
| Albumin                                | 31.3  | 30.3 | 34.1              | 31.2                  |
| Globulin                               | 22.6  | 21.1 | 26.4              | 21.6                  |
| Urea                                   | 5.1   | 4.5  | 4.4               | 7                     |
| Creatinine                             | 23    | 23   | 22                | 29                    |
